# Supplementary material for: Effects of CO and CO2 on the desulfurization of H2S using a ZnO sorbent: a density functional theory study
Source: Royal Society of Chemistry journal article supplement (doi:10.1039/c6cp01422d), 2016-01-01
Supplement: c6cp01422d1.pdf [file c6cp01422d1.pdf]

## Supporting Information

Effect of CO and CO<sub>2</sub> on the desulfurization of H<sub>2</sub>S using ZnO sorbent:

### A density functional theory study

Lixia Ling <sup>a</sup>, Zhongbei Zhao <sup>a</sup>, Baojun Wang <sup>\*, b</sup>, Maohong Fan <sup>\*, c</sup>, Riguang Zhang <sup>b</sup>

a) *College of Chemistry and Chemical Engineering, Taiyuan University of Technology, Taiyuan 030024, Shanxi, P.R. China E-mail: [linglixia@tyut.edu.cn](mailto:linglixia@tyut.edu.cn)*

b) *Key Laboratory of Coal Science and Technology (Taiyuan University of Technology), Ministry of Education and Shanxi Province, Taiyuan 030024, Shanxi, People' Republic of China E-mail: [wangbaojun@tyut.edu.cn](mailto:wangbaojun@tyut.edu.cn)*

c) *Department of Chemical and Petroleum Engineering, the University of Wyoming, Laramie, WY 82071, USA E-mail: [mfan@uwyo.edu](mailto:mfan@uwyo.edu)*

Page S1: **Table S1**: The imaginary frequency of every transition state.

Page S1: **Table S2**: Electronic total energy, enthalpy correction ( $H'$ ) and Gibbs free energy correction ( $G'$ ) of every species for R1 and R2 at different temperatures (K).

Page S1: **Table S3**: Electronic total energy, enthalpy correction ( $H'$ ) and entropy (S) for the rate-determined step of forming COS at different temperatures (K).

**Table S1** The imaginary frequency of every transition state.

| H <sub>2</sub> S+CO |                                        | H <sub>2</sub> S+CO <sub>2</sub> |                                        |
|---------------------|----------------------------------------|----------------------------------|----------------------------------------|
| Transition state    | Imaginary frequency(cm <sup>-1</sup> ) | Transition state                 | Imaginary frequency(cm <sup>-1</sup> ) |
| TS1                 | -138.33                                | TS1*                             | -195.13                                |
| TS2                 | -936.01                                | TS2*                             | -235.71                                |
| TS3                 | -112.03                                | TS3*                             | -1095.74                               |
| TS4                 | -185.32                                | TS4*                             | -134.57                                |
| TS5                 | -298.51                                | TS5*                             | -345.24                                |
|                     |                                        | TS6*                             | -1685.37                               |
|                     |                                        | TS7*                             | -71.32                                 |
|                     |                                        | TS8*                             | -1671.95                               |

**Table S2** Electronic total energy, enthalpy correction ( $H'$ ) and Gibbs free energy correction ( $G'$ ) of every species for R1 and R2 at different temperatures (K).

|                  | $E_{\text{elec}}(\text{kJ}\cdot\text{mol}^{-1})$ | $H'$ (including ZPVE) ( $\text{kJ}\cdot\text{mol}^{-1}$ ) |      |      |      | $G'$ (including ZPVE) ( $\text{kJ}\cdot\text{mol}^{-1}$ ) |       |        |        |
|------------------|--------------------------------------------------|-----------------------------------------------------------|------|------|------|-----------------------------------------------------------|-------|--------|--------|
|                  |                                                  | 298.15                                                    | 500  | 650  | 1000 | 298.15                                                    | 500   | 650    | 1000   |
| H <sub>2</sub> S | -1048628.5                                       | 51.6                                                      | 60.5 | 67.5 | 85.3 | -15.8                                                     | -64.0 | -102.2 | -197.6 |
| CO               | -297524.7                                        | 21.4                                                      | 27.3 | 31.9 | 43.1 | -37.6                                                     | -79.2 | -111.7 | -191.6 |
| COS              | -1343129.4                                       | 31.0                                                      | 39.9 | 47.1 | 64.9 | -29.1                                                     | -72.3 | -106.9 | -193.8 |
| H <sub>2</sub>   | -3073.2                                          | 34.8                                                      | 40.7 | 45.0 | 55.3 | -5.8                                                      | -35.0 | -58.3  | -116.3 |
| CO <sub>2</sub>  | -495223.1                                        | 40.2                                                      | 49.5 | 57.2 | 76.8 | -1.0                                                      | -31.4 | -56.7  | -122.4 |
| H <sub>2</sub> O | -200695.2                                        | 64.7                                                      | 71.6 | 77.0 | 90.6 | 6.6                                                       | -34.6 | -67.2  | -147.9 |

**Table S3** Electronic total energy, enthalpy correction ( $H'$ ) and entropy ( $S$ ) for the rate-determined step of forming COS at different temperatures (K).

|      | $E_{\text{elec}}(\text{kJ}\cdot\text{mol}^{-1})$ | $H'$ (including ZPVE) ( $\text{kJ}\cdot\text{mol}^{-1}$ ) |        |        | $S$ ( $\text{J}\cdot\text{mol}^{-1}\cdot\text{K}^{-1}$ ) |        |        |
|------|--------------------------------------------------|-----------------------------------------------------------|--------|--------|----------------------------------------------------------|--------|--------|
|      |                                                  | 298.15                                                    | 500    | 1000   | 298.15                                                   | 500    | 1000   |
| IM4  | -39478285.8                                      | 944.1                                                     | 1384.5 | 2574.3 | 2358.6                                                   | 3480.9 | 5124.8 |
| TS4  | -39478198.1                                      | 939.3                                                     | 1378.7 | 2564.9 | 2396.7                                                   | 3516.2 | 5155.2 |
| IM6* | -39675956.4                                      | 964.0                                                     | 1406.7 | 2606.0 | 2369.4                                                   | 3497.3 | 5154.1 |
| TS6* | -39675814.0                                      | 949.9                                                     | 1391.6 | 2588.4 | 2363.7                                                   | 3488.9 | 5142.3 |
